# Supplementary material
Source: PubMed Central journal article supplement (PMC3558030)
Supplement: NIHMS435256-supplement-Supplemental_Digital_Content_1.pdf [file NIHMS435256-supplement-Supplemental_Digital_Content_1.pdf]

**Supplemental Figure 1. Total genomic load by disease category.** The non-normalized number of non-synonymous variants in each disease category of each genome is shown. Data are plotted in order of their genome's

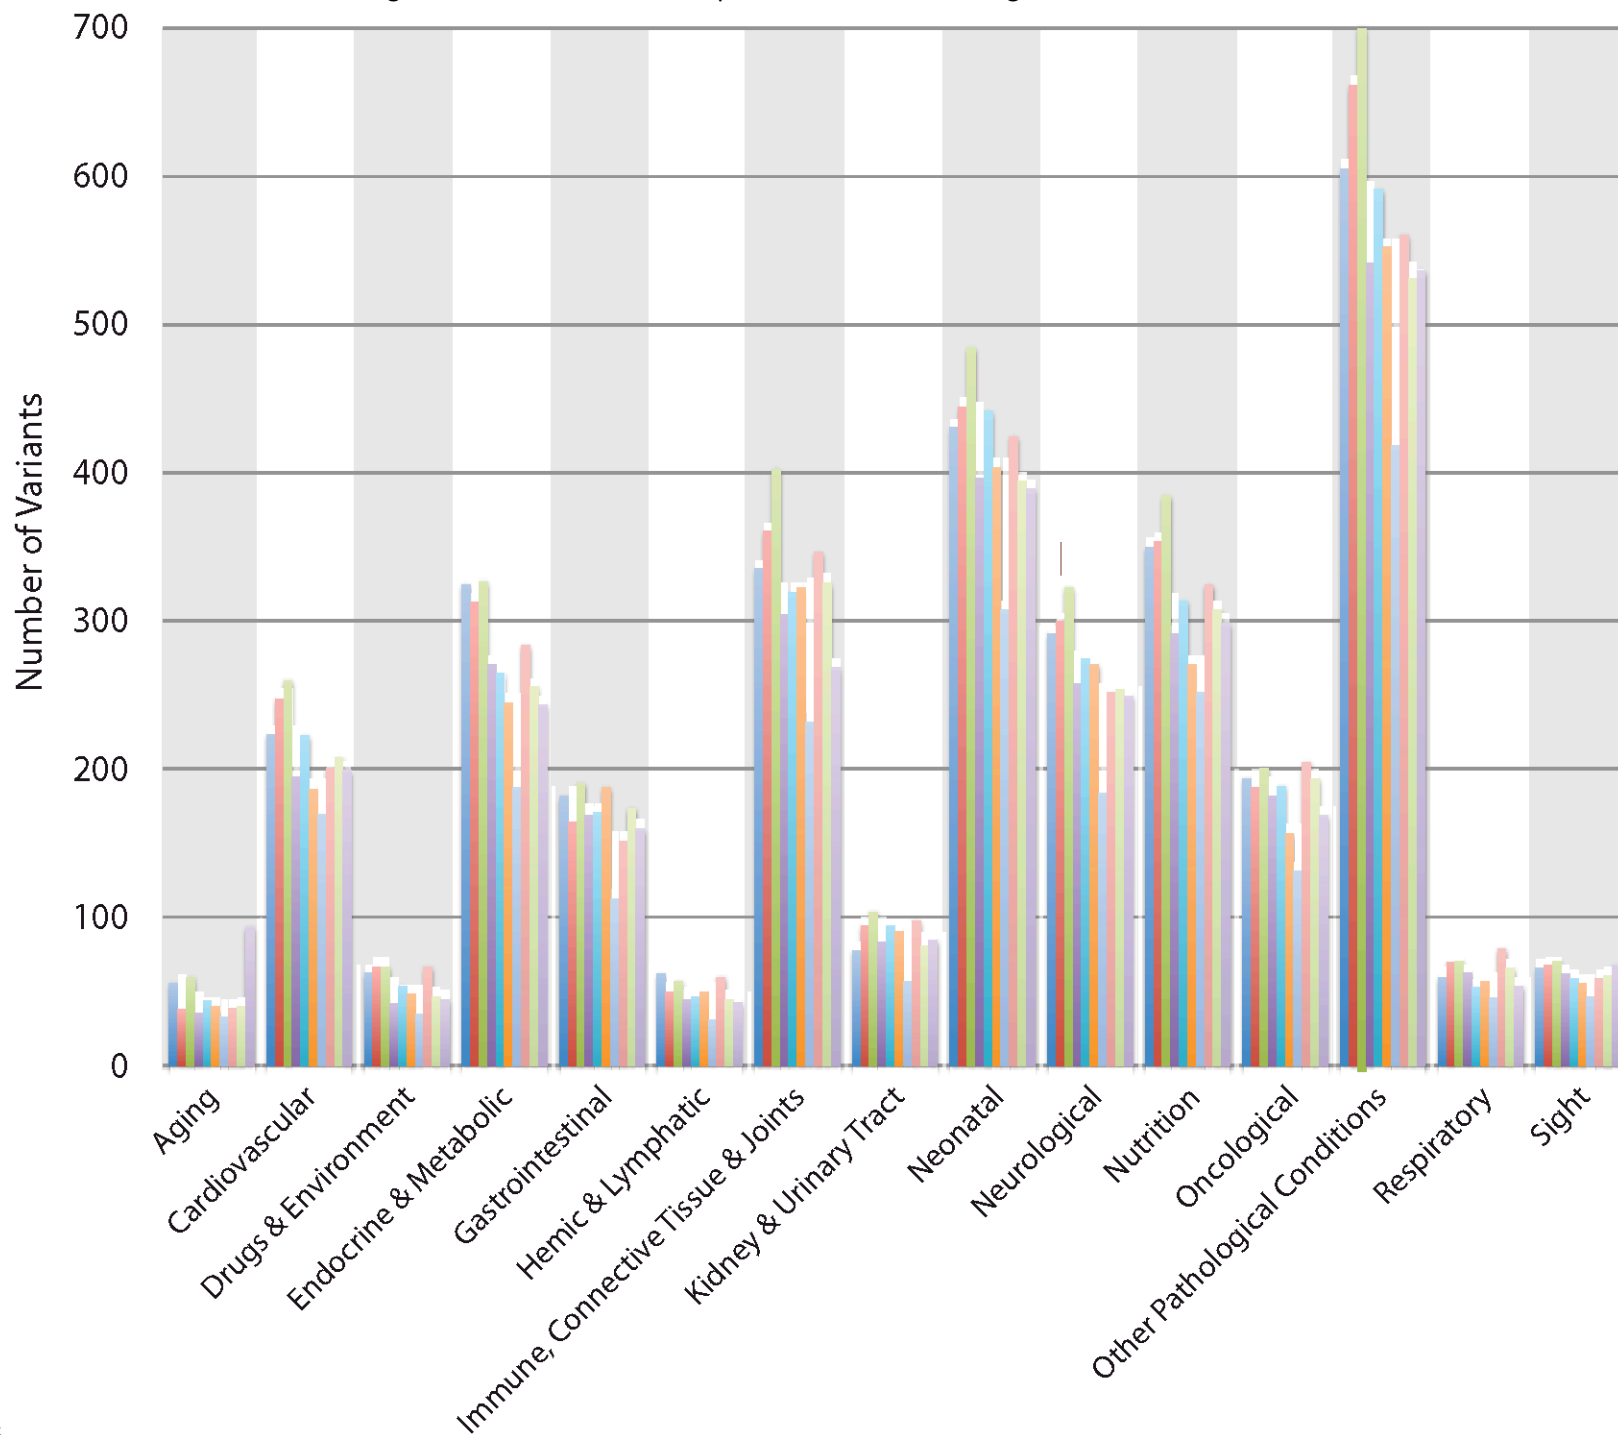

identifiers.
